# Supplementary material
Source: HighWire-hosted journal article supplement (https://informatics.bmj.com/content/31/1/e101102)
Supplement: inline-supplementary-material-1 [file inline-supplementary-material-1.pdf]

Appendix 1. Checklist for Reporting Results of Internet E-Surveys (CHERRIES)

| Item Category                                                                        | Checklist item                   | Described in the manuscript | Cited from the manuscript                                                                                                                                                                                                                |
|--------------------------------------------------------------------------------------|----------------------------------|-----------------------------|------------------------------------------------------------------------------------------------------------------------------------------------------------------------------------------------------------------------------------------|
| Design                                                                               | Describe survey design           | Yes                         | In Method section                                                                                                                                                                                                                        |
| IRB (Institutional Review Board) approval and informed consent process               | IRB approval                     | Yes                         | Ethical approval was obtained from the Faculty of Psychology, University of Basel, Switzerland (Protocol # EKFP-034-23-1).                                                                                                               |
|                                                                                      | Informed consent                 | Yes                         | All invited GPs were assured that their identities would not be disclosed to investigators and all participants gave informed consent before taking part.                                                                                |
|                                                                                      | Data protection                  | Yes                         | All personal data such as email addresses were removed from respondents' ID before the transfer of the data to the research team. Wwww.doctors.net.uk meets the requirements of the EU Law on General Data Protection Regulation (GDPR). |
| Development and pre-testing                                                          | Development and testing          | Yes                         | The survey was pretested and piloted with 6 UK GPs.                                                                                                                                                                                      |
| Recruitment process and description of the sample having access to the questionnaire | Open survey versus closed survey | Yes                         | We surveyed GPs registered with the clinician marketing service Doctors.net.uk, the largest professional network for UK doctors currently registered with the General Medical Council,                                                   |
|                                                                                      | Contact mode                     | Yes                         | Depending on GPs' preferences for survey invitations, the study was advertised via email and/or displayed on the Doctors.net.uk homepages of selected members.                                                                           |

|                       |                                          |           |                                                                                                                                                                                                                                               |
|-----------------------|------------------------------------------|-----------|-----------------------------------------------------------------------------------------------------------------------------------------------------------------------------------------------------------------------------------------------|
|                       | Advertising the survey                   | Yes       | Depending on GPs’ preferences for survey invitations, the study was advertised via email and/or displayed on the Doctors.net.uk homepages of selected members.                                                                                |
| Survey administration | Web/E-mail                               | Both      | Depending on GPs’ preferences for survey invitations, the study was advertised via email and/or displayed on the Doctors.net.uk homepages of selected members.                                                                                |
|                       | Context                                  | Yes       | Doctors.net.uk, the largest professional network for UK doctors currently registered with the General Medical Council,(7) with 254,741 members out of a total of approximately 379,208 registered UK doctors (67%).                           |
|                       | Mandatory/voluntary                      | Voluntary | All participants gave informed consent before taking part.                                                                                                                                                                                    |
|                       | Incentives                               | Yes       | A small incentive worth £7.50 (\$8.80, €8.83) in exchangeable shopping vouchers was provided on completion.                                                                                                                                   |
|                       | Time/Date                                | Yes       | The survey ran from February 2 to 22, 2024.                                                                                                                                                                                                   |
|                       | Randomization of items or questionnaires | No        |                                                                                                                                                                                                                                               |
|                       | Adaptive questioning                     | Yes       | In response to the high percentage who reported using generative AI, on 8 February, after 200 responses had been gathered, we added a follow-up question for those who answered affirmatively: ‘What are you using the tools to assist with?’ |
|                       | Number of Items                          | No        |                                                                                                                                                                                                                                               |
|                       | Number of screens (pages)                | No        |                                                                                                                                                                                                                                               |

|                                                      |                                                                                                           |     |                                                                                                             |
|------------------------------------------------------|-----------------------------------------------------------------------------------------------------------|-----|-------------------------------------------------------------------------------------------------------------|
|                                                      | Completeness check                                                                                        | Yes | A small incentive worth £7.50 (\$8.80, €8.83) in exchangeable shopping vouchers was provided on completion. |
|                                                      | Review step                                                                                               | No  |                                                                                                             |
| Response rates                                       | Unique site visitor                                                                                       | No  |                                                                                                             |
|                                                      | View rate (Ratio of unique survey visitors/unique site visitors)                                          | No  |                                                                                                             |
|                                                      | Participation rate (Ratio of unique visitors who agreed to participate/unique first survey page visitors) | No  |                                                                                                             |
|                                                      | Completion rate (Ratio of users who finished the survey/users who agreed to participate)                  | No  |                                                                                                             |
|                                                      |                                                                                                           |     |                                                                                                             |
| Preventing multiple entries from the same individual | Cookies used                                                                                              | No  |                                                                                                             |
|                                                      | IP check                                                                                                  | No  |                                                                                                             |
|                                                      | Log file analysis                                                                                         | No  |                                                                                                             |
|                                                      | Registration                                                                                              | No  |                                                                                                             |
| Analysis                                             | Handling of incomplete questionnaires                                                                     | Yes | Participants are requested to answer all closed ended questions.                                            |
|                                                      | Questionnaires submitted with an atypical timestamp                                                       | No  |                                                                                                             |
|                                                      | Statistical correction                                                                                    | No  |                                                                                                             |

Reference:  
Eysenbach G. Improving the quality of Web surveys: the Checklist for Reporting Results of Internet E-Surveys (CHERRIES). J Med Internet Res 2004;6:e34.
